# Supplementary material for: High Glucose Induces Toll-Like Receptor Expression in Human Monocytes: Mechanism of Activation
Source: PubMed Central journal article supplement — Diabetes. 2008 Nov;57(11):3090–8. doi: 10.2337/db08-0564 (PMC2570406; doi:10.2337/db08-0564), 2008-11
Supplement: db08-0564_1.pdf [file db08-0564_1.pdf]

## *Online Appendix*

### **Methods: Reagents**

THP-1 human monocytic cell line was obtained from American Type Culture Collection (Manassas, VA). Endotoxin-free, glucose-free RPMI-1640 media and fetal bovine serum (FBS) were purchased from Gibco BRL (Carlsbad, CA). Antibiotics, glutamine, phenylmethylsulfonyl fluoride, endotoxin-free D-glucose/mannitol, HEPES, protease inhibitor cocktail, Triton X-100, dithiothreitol (DTT) were from Sigma Chemical (St. Louis, MO). Calphostin-C (5 & 10 $\mu$ mol/l), chelerythrine (2.5 & 5 $\mu$ mol/l), GF109203X (5 & 10 $\mu$ mol/l), Apocynin (15, 30 $\mu$ mol/l), and diphenyleneiodonium chloride (DPI, 5 & 10 $\mu$ mol/l), were obtained from Calbiochem. Purified LPS was obtained from List Biological Laboratory Inc. A synthetic bacterial lipoprotein (PamCAG: palmitoyl-Cys((RS)-2,3-di(palmitoyloxy)propyl)-Ala-Gly-OH) was purchased from Bachem (King of Prussia, PA). Poly(I:C) was purchased from Amersham Biosciences (Piscataway, NJ). Macrophage-activating lipopeptide, 2 kDa (MALP-2) was purchased from Alexis Biochemical (San Diego, CA). Mouse pDisplay-HA-TLR4, 2, 1 and 6 were obtained from Lynn Hajjar (University of Washington). NF- $\kappa$ B (2x)-luciferase reporter construct was provided by Frank Mercurio (Signal Pharmaceuticals, San Diego, CA). pRSV- $\beta$ -galactosidase plasmid was from Jongdae Lee (University of California, San Diego, CA). Anti-human TLR2 (#17-922) and TLR4 antibodies (#12-9917) or isotype matched IgG controls (mouse IgG2a, #14-4724) were obtained from eBioscience, San Diego, CA. Interleukin receptor associated Kinase-1 (IRAK-1), MyD88, total IRAK-1, and anti-rabbit or anti-mouse IgG-horseradish protein were from Cell Signaling, MA. Pre-validated Protein Kinase C- $\alpha$  (Genbank# NM\_002737), Protein kinase C- $\beta$  (Genbank # NM\_002738), Protein Kinase C- $\delta$  (GenBank#NM\_212539.1), and p47Phox (Genbank# NM\_000265), TLR2 (GenBank# NM\_003264), and TLR4 (Genbank# NM\_138554) siRNAs and siPORT amine reagent were purchased from Ambion (Austin, TX). The concentrations of the various inhibitors and siRNAs used in the present study were cautiously titrated and determined in pilot studies and were reported previously (15, 30, 32).

**siRNA Transfection assays:** Pre-validated small interfering RNAs (siRNA) were obtained from Ambion and transfection assays were performed as described previously (32) following manufacturer's instructions, with suitable vehicle and scrambled siRNA controls, and subsequently treated with HG (15mM) for 24hrs. Transfection rates of 70-80% of cells were accepted for all the experiments. Knock-down efficiency of the siRNAs is indicated via i) flow cytometric analysis of TLR2 and TLR4, ii) real time RT-PCR of the target gene, and iii) measuring the end product (cytokines) of the target gene.

**NF- $\kappa$ B transcription factor Assay:** NF- $\kappa$ B p65 DNA binding activity in the HG treated nuclear extracts of monocytes was determined using the nonradioactive TransAM transcription factor assay® (Active Motif, Carlsbad, CA) as described in detail (30) following manufacturer's instructions. The intra and inter assay CV for these assays was < 7%.

**PKC activity assays:** PKC activity in monocytes was determined by non-radioactive immunoassay (Stressgen, Ann Arbor, MI) effectively same as previously described (30) following manufacturer's instructions. Relative PKC activity in the cell lysates is calculated and expressed as Absorbance/mg protein. The intra and inter assay CV was < 10%.

**Human Toll like receptor pathway specific RT<sup>2</sup> Profiler<sup>TM</sup> PCR Array analysis:** Quantitative RT-PCR was performed using manufacturer's protocols for the (Human Toll like receptor Pathway Superarray, Gaithersburg, MD). A minimum of three array plates were used per treatment. Relative gene expressions were calculated by using the  $2^{-\Delta\Delta Ct}$  method and normalized  $\Delta Ct$  value of each sample (31) using a total of five endogenous control genes (B2M, *HPRT1*, *RPL13A*, *GAPDH*, and *ACTB*). Fold change values are then presented as average fold change =  $2^{-(\text{average } \Delta\Delta Ct)}$  for genes in treated relative to control samples.

**Appendix Table 1.** Up regulated TLR pathway genes in high glucose treated THP-1 monocytic cells compared to 5.5mM glucose.

| <b>Gene name</b>                                            | <b>Gene symbol</b> | <b>Fold change</b> | <b>P value</b> |
|-------------------------------------------------------------|--------------------|--------------------|----------------|
| Toll like receptor-4                                        | TLR4               | 364.5              | 8.99E-06       |
| TANK binding kinase-1                                       | TBK1               | 88.2               | 5.47E-05       |
| Interleukin-1 receptor associated kinase-1                  | IRAK1              | 58.7               | 5.54E-05       |
| Tumor necrosis factor                                       | TNF                | 19.9               | 0.00041        |
| Toll like receptor-2                                        | TLR2               | 48.6               | 0.000937       |
| Myeloid differentiation factor 88                           | MYD88              | 24.4               | 0.001391       |
| Nuclear factor- $\kappa$ gene enhancer in Bcells inhibitor  | NFKBIA             | 27.7               | 0.002593       |
| Toll like receptor-7                                        | TLR7               | 12.0               | 0.004228       |
| Interleukin-1, beta                                         | IL1B               | 8.0                | 0.005928       |
| Bruton agammaglobulinemia tyrosine kinase                   | BTK                | 38.8               | 0.006463       |
| Nuclear factor- $\kappa$ gene enhancer in Bcells (p50/p105) | NFKB2              | 6.0                | 0.006847       |
| Nuclear factor- $\kappa$ gene enhancer in Bcells (p50/p65)  | NFKB1              | 23.3               | 0.008725       |
| TNF receptor associated factor 6                            | TRAF6              | 2.1                | 0.016014       |
| Toll like receptor adaptor molecule 2                       | TICAM2             | 5.9                | 0.017876       |
| Toll like receptor-6                                        | TLR6               | 5.3                | 0.019813       |
| Chemokine (C-X-C motif) ligand 10                           | CXCL10             | 17.6               | 0.024761       |
| CD14 antigen                                                | CD14               | 1.8                | 0.03063        |
| Interferon regulatory factor 1                              | IRF1               | 8.0                | 0.048628       |
| Toll like receptor 3                                        | TLR3               | 4.5                | 0.049366       |
| Interleukin 6                                               | IL6                | 3.8                | 0.056191       |

|                                                        |       |     |          |
|--------------------------------------------------------|-------|-----|----------|
| Inhibitor of kappa light chain in B cells, kinase beta | IKBKB | 4.8 | 0.504698 |
|--------------------------------------------------------|-------|-----|----------|

---

**House Keeping genes**

|                      |     |       |    |
|----------------------|-----|-------|----|
| Beta 2 microglobulin | B2M | -0.28 | NS |
|----------------------|-----|-------|----|

|                                          |       |       |    |
|------------------------------------------|-------|-------|----|
| Hypoxanthine phosphoribosyltransferase 1 | HPRT1 | -0.48 | NS |
|------------------------------------------|-------|-------|----|

|                        |        |       |    |
|------------------------|--------|-------|----|
| Ribosomal Protein L13A | RPL13A | -0.27 | NS |
|------------------------|--------|-------|----|

|                                          |       |       |    |
|------------------------------------------|-------|-------|----|
| Glyceraldehyde-3-phosphate dehydrogenase | GAPDH | -0.42 | NS |
|------------------------------------------|-------|-------|----|

|            |      |       |    |
|------------|------|-------|----|
| Actin-Beta | ACTB | -0.38 | NS |
|------------|------|-------|----|

---

## Appendix Figure 1

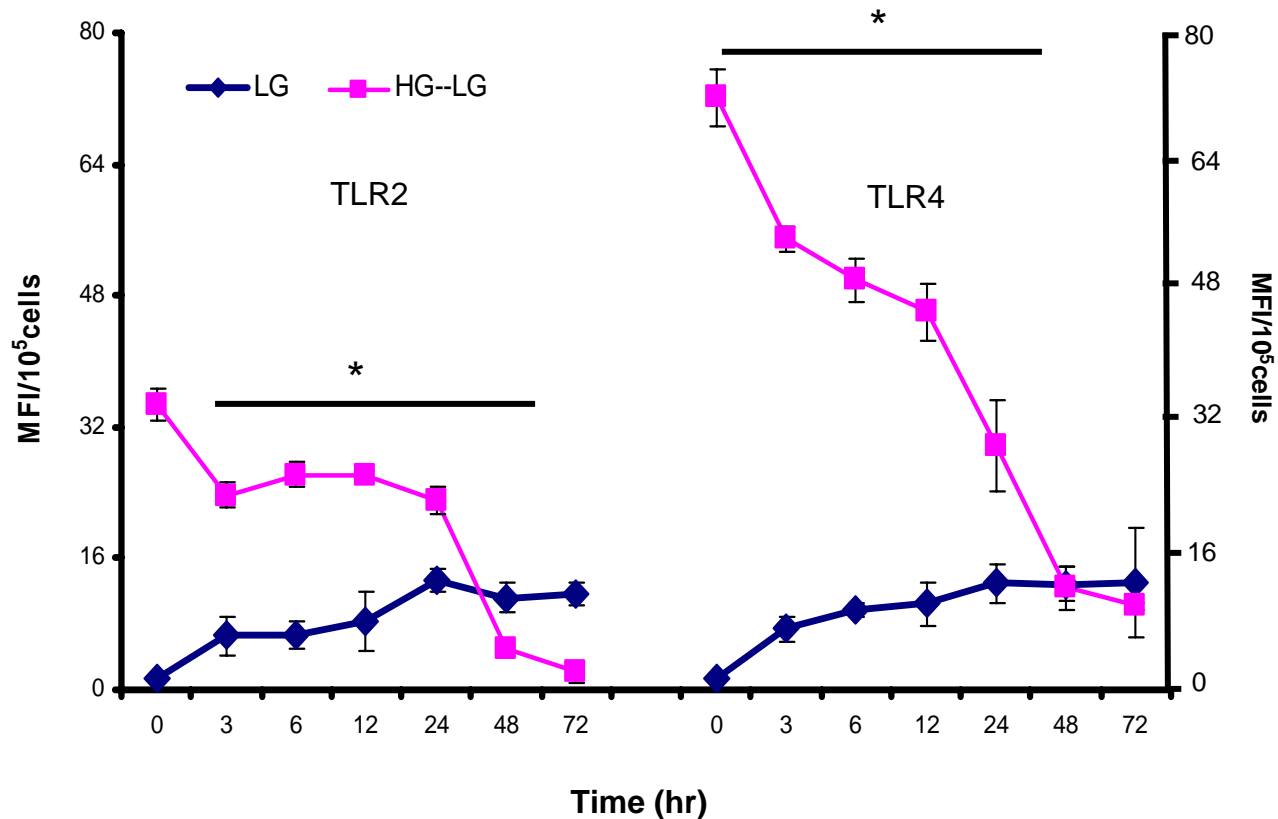

THP-1 cells were challenged with HG for 24hr, transferred to 5mM glucose (LG), and TLR2 and TLR4 expressions were measured at indicated time points by Flow cytometry as described in Methods. Values are expressed as mean fluorescence intensity units (MFI)/10<sup>5</sup> cells  $\pm$  SD. \*P<0.05 vs LG alone; n = 4 experiments. HG=High glucose
